# Supplementary material
Source: PubMed Central journal article supplement (PMC4304912)
Supplement: NIHMS635907-supplement-Supp_TableS2.pdf [file NIHMS635907-supplement-Supp_TableS2.pdf]

|                       | <u>Source</u> | <u>Source Name</u>       | <u>Build</u> |
|-----------------------|---------------|--------------------------|--------------|
| <b>ESC DNaseI-seq</b> | GSM1014187    | ES-CJ7 Peak 1 and Peak 2 | mm9          |

**ESC CHIP datasets**

|                   |                            |                     |     |
|-------------------|----------------------------|---------------------|-----|
| H3K4me3           | <a href="#">GSM590112</a>  | E14-2i_H3K4me3      | mm9 |
| H3K27me3          | <a href="#">GSM590116</a>  | E14-2i_H3K27me3     | mm9 |
| Ezh2              | <a href="#">GSM590133</a>  | E14-2i_Ezh2         | mm9 |
| H3K36me3          | <a href="#">GSM590120</a>  | E14-2i_H3K36me3     | mm9 |
| H3K4me3           | <a href="#">GSM307618</a>  | ES_H3K4me3_ChIPSeq  | mm9 |
| H3K27me3          | <a href="#">GSM307619</a>  | ES_H3K27me3_ChIPSeq | mm9 |
| Oct4, Sox2, Nanog | <a href="#">GSM307137</a>  | oct4_mES_rep1       | mm8 |
|                   | <a href="#">GSM307138</a>  | sox2_mES_rep1       | mm8 |
|                   | <a href="#">GSM307140</a>  | Nanog_mES_rep1      | mm8 |
|                   | <a href="#">GSM1082340</a> | ChIP-Seq_Oct4_V65   | mm9 |
|                   | <a href="#">GSM1082341</a> | ChIP-Seq_Sox2_V65   | mm9 |
|                   | <a href="#">GSM1082342</a> | ChIP-Seq_Nanog_V65  | mm9 |

**Microarray Analysis**

|                     |          |  |  |
|---------------------|----------|--|--|
| ESC in 2i vs EpiSCs | GSE31461 |  |  |
|---------------------|----------|--|--|
