# Supplementary material
Source: PubMed Central journal article supplement (PMC4304912)
Supplement: NIHMS635907-supplement-Supp_TableS3.pdf [file NIHMS635907-supplement-Supp_TableS3.pdf]

|         |                 |                                                   |
|---------|-----------------|---------------------------------------------------|
| Cloning | FGF5            |                                                   |
|         | F5promF         | 5'- ATCGCTAGCGGAAGTGACTCTTCAAATGGAC-3'            |
|         | F5promR         | 5'- ATCCTCGAGACAGGGTGGACATAGCCTC                  |
|         | Fgf5-ΔPE F      | 5'-CCC GGG CTC GAG ATC GGA CCC TTT GGA AGG AAA C  |
|         | Fgf5-PE F       | 5'-CCCGGGCTCGAGATCGGAAGTGACTCTTCAA                |
|         | Fgf5-PE R       | 5'-TAA GAG CTC GAG ATC CAC TCT TTA CCC AGC ACC    |
|         | Fgf5Prom-Δ850 F | 5'-CCC GGG CTC GAG ATC TCA GGG TGG CTC TCT AGT GG |
|         | Fgf5Prom-Δ850 R | 5'-TTA GAT CGC AGA TCT ACA GGG TGG ACA TAG CCT C  |
|         | enhancer E1 F   | 5'-ataggatccGCGTTAAGTATATCTCTATTCCCTGTAC          |
|         | enhancer E1 R   | 5'-ataggatccCTCTCCTGAGCAAGCAAGG                   |
|         | enhancer E2 F   | 5'-ataAgatctCATCAGGAAGTGAATCTGGC-3'               |
|         | enhancer E2 R   | 5'-ataAgatctACCGACAGAAGGGACAGATT-3'               |
|         | enhancer E3 F   | 5'-ataGgatccCCATCGCAGATCCCTAAAG -3'               |
|         | enhancer E3 R   | 5'-ataGgatccTTATTAATCCCTAGGGTGAGCC -3'            |
|         | enhancer E4 F   | 5'-ataGgatccATCATATTCTCAGGCTTCGC-3'               |
|         | enhancer E4 R   | 5'-ataGgatccATCGGCCTGTAGAAGTTCTCT-3'              |
|         | FGF4            |                                                   |
|         | F4enh2 F        | 5' tctcg ggatcc GGG CTT CCT CAA CTC CCT TTC       |
|         | F4enh2 R        | 5' ctagc ggatcc AGT AGC TCA GAA CAC TGA GGG TAG   |
| RT-PCR  | Nanog F         | CCTCAGCCTCCAGCAGAT                                |
|         | Nanog R         | CCGCTTGCACTTCACCCTTTG                             |
|         | Zfp42 F         | GGCTGCGAGAAGAGCTTTATTCA                           |
|         | Zfp42 R         | AGCATTCTTCCCGGCCTTT                               |
|         | Fgf4 F          | CACGAGGGACAGTCTTCTGG                              |
|         | Fgf4 R          | CGTCGGTAAAGAAAGGCACA                              |
|         | Klf4 F          | GCGAACTCACACAGGCGAGAAA                            |
|         | Klf4 R          | TCGCTTCTCTTCTCCGACACA                             |
|         | Blimp1 F        | AGCATGACCTGACATTGACACC                            |
|         | Blimp1 R        | CTCAACTCTCATGTAAGAGGC                             |
|         | Nodal F         | ACT GAG GGC CCA CTC ACC AT                        |
|         | Nodal R         | CGG TGA ACG TCT CCA TCC AA                        |
|         | Colec12 F       | GCA GTC CTT CGG TTA CAA GAG                       |
|         | Colec12 R       | CTG TGA TGG TCA GTA AGG CAC                       |
|         | Cpe F           | CCT TCG AGT ACC ACC GCT ATC                       |
|         | Cpe R           | CAA CCG CCT CAT TAC CAT GC                        |
|         | Dppa5 F         | ATG ATG GTG ACC CTC GTG AC                        |
|         | Dppa5 R         | ACC TCG ATA AGT TCT TCG GGA G                     |
|         | Hhip F          | ACC CAC CGC TTC TTT GTC G                         |
|         | Hhip R          | CCA TGC TCT TGA GAT CCA GGA                       |
|         | NrOB1 F         | CCA ACA CGA CGC AGG AAA TG                        |
|         | NrOB1 R         | TGG TGT CAA TGT TCA GAC TCC A                     |
|         | Pla2g1b F       | TGG ACG ACT TAG ACA GGT GCT                       |
|         | Pla2g1b R       | AGT CCT CGC ATT TGT TGT TTT TG                    |
|         | Sema6a F        | AAC TTC ATT AAG ACG CAT CCA CT                    |
|         | Sema6a R        | GGA AAC CAC TGC TTC CTA TCC                       |

|           |                             |
|-----------|-----------------------------|
| Tfcp2l1 F | CAG CCC GAA CAC TAC AAC CAG |
| Tfcp2l1 R | CAG CCG GAT TTC ATA CGA CTG |
| Thbs1 F   | GGG GAG ATA ACG GTG TGT TTG |
| Thbs1 R   | CGG GGA TCA GGT TGG CAT T   |
| FGF5 F    | TGTGTCTCAGGGGATTGTAGG       |
| FGF5 R    | AGCTGTTTTCTTGAATCTCTCC      |
| Esrrb F   | CAGGCAAGGATGACAGACG         |
| Esrrb R   | GAGACAGCACGAAGGACTGC        |
| GapDH f   | ATTCAACGGCACAGTCAAGG        |
| GapDH R   | TGGATGCAGGGATGATGTTC        |
| Oct4F     | GAAGCAGAAGAGGATCACCTT       |
| Oct4R     | TTCTTAAGGCTGAGCTGCAAG       |
| GlastF    | CCAAAAGCAACGGAGAAGAG        |
| GlastR    | CCTCCCGGTAGCTCATTTTA        |
| Sox2F     | CCTGACAGCCCCATCAC           |
| Sox2R     | GGCTTAAGCCTCGGGCTC          |
| BlbpF     | GGGTAAGACCCGAGTTCCTC        |
| BlbpR     | ATCACCACTTTGCCACCTTC        |

|                 |                             |
|-----------------|-----------------------------|
| Dnase1 sen R1 F | TGAGTCACAACCTCCGGTC         |
| R1 R            | GAGGGGGGGTAACTAAGG          |
| R2 F            | CAA GCT GAT AGG GCA CCG     |
| R2 R            | GAGGCAGAAGGCGGTTG           |
| R3 F            | GTC GTG CAC ATC CTG TGA G   |
| R3 R            | GACTCTGCACGACGCAC           |
| R4 F            | GGG TAG ACT GCC AGG TGA G   |
| R4 R            | CAACTTCTGTGGGTGGTG          |
| R5 F            | GCC TTT CTA AGG CAG GAA GG  |
| R5 R            | GCTTGCTTTGGGAGGGATG         |
| R6 F            | CAG CTG CCC ATT CCT CTG     |
| R6 R            | GATCCAGAGACAGCCAAGGT        |
| R7 F            | GCT GAG CTC CAG GAA CAC     |
| R7 R            | CCAGGCTCAAGACTTGGAG         |
| R8 F            | CCT AAC GGG ATG ACA TGG GAG |
| R8 R            | CCTTAGTGGTTCTGCGTGC         |
| R9 F            | GGCCTGGGTATCAACCAC          |
| R9 R            | TCCTCTACCTGCACCTAA          |
