# Supplementary material
Source: PubMed Central journal article supplement (PMC4304912)
Supplement: NIHMS635907-supplement-Supp_TableS7.pdf [file NIHMS635907-supplement-Supp_TableS7.pdf]

## SUPPLEMENTAL TABLE S5 GREAT ANALYSIS

GREAT version 2.0.2

Species assembly: mm9

Association rule: Basal+extension: 5000 bp upstream, 1000 bp downstream, 100000 bp max extension

### ALL ESC CLUSTERS

| Ontology                 | # Term Name                                                | P-Value      | Total Regions | Gene Hits |
|--------------------------|------------------------------------------------------------|--------------|---------------|-----------|
| GO Molecular<br>Function | regulatory region DNA binding                              | 5.44E-223    | 2190          | 275       |
|                          | transcription regulatory region DNA binding                | 3.83E-215    | 2118          | 266       |
|                          | transcription factor binding                               | 9.83E-203    | 2226          | 310       |
|                          | kinase binding                                             | 1.68E-190    | 2055          | 304       |
|                          | protein kinase binding                                     | 2.16E-166    | 1794          | 264       |
|                          | transcription factor binding transcription factor activity | 5.30E-163    | 1880          | 275       |
|                          | transcription cofactor activity                            | 8.29E-158    | 1817          | 265       |
|                          | small GTPase regulator activity                            | 7.66E-152    | 1730          | 233       |
|                          | structure-specific DNA binding                             | 9.29E-110    | 1257          | 184       |
|                          | structural constituent of ribosome                         | 5.66E-94     | 722           | 153       |
| GO Biological<br>Process | negative regulation of gene expression                     | 0            | 5191          | 721       |
|                          | chordate embryonic development                             | 3.59591e-319 | 3586          | 500       |
|                          | protein complex subunit organization                       | 5.98E-213    | 2417          | 389       |
|                          | in utero embryonic development                             | 8.33E-213    | 2222          | 306       |
|                          | protein complex biogenesis                                 | 4.08E-210    | 2367          | 379       |
|                          | protein complex assembly                                   | 1.15E-208    | 2356          | 377       |
|                          | chromatin modification                                     | 6.02E-194    | 2207          | 343       |
|                          | posttranscriptional regulation of gene expression          | 3.92E-182    | 1668          | 262       |
|                          | actin filament-based process                               | 1.21E-149    | 1651          | 226       |
|                          | actin cytoskeleton organization                            | 2.83E-145    | 1584          | 214       |
| Mouse<br>Phenotype       | prenatal lethality                                         | 0            | 11776         | 1770      |
|                          | embryonic lethality                                        | 0            | 8939          | 1338      |
|                          | embryonic lethality during organogenesis                   | 0            | 5726          | 808       |
|                          | abnormal embryonic tissue morphology                       | 0            | 5919          | 801       |
|                          | abnormal prenatal growth/weight/body size                  | 0            | 6567          | 894       |
|                          | complete embryonic lethality during organogenesis          | 0            | 4611          | 647       |
|                          | abnormal embryonic growth/weight/body size                 | 0            | 5586          | 753       |

|                |                                                                   |   |       |      |
|----------------|-------------------------------------------------------------------|---|-------|------|
|                | abnormal prenatal body size                                       | 0 | 4922  | 655  |
|                | abnormal neural tube morphology/development                       | 0 | 3627  | 485  |
|                | abnormal embryo size                                              | 0 | 4056  | 534  |
| MGI Expression | TS23_testis                                                       | 0 | 10405 | 1608 |
|                | Theiler_stage_5                                                   | 0 | 7656  | 1078 |
|                | Theiler_stage_4                                                   | 0 | 7710  | 1094 |
|                | TS4_embryo                                                        | 0 | 7670  | 1084 |
|                | TS4_extraembryonic component                                      | 0 | 7248  | 1032 |
|                | TS23_collecting duct                                              | 0 | 6193  | 964  |
|                | TS23_nephrogenic zone                                             | 0 | 6487  | 1003 |
|                | TS4_inner cell mass                                               | 0 | 6397  | 895  |
|                | TS3_second polar body                                             | 0 | 6366  | 904  |
|                | TS3_zona pellucida                                                | 0 | 6333  | 898  |
| MSigDB         | Genes up-regulated in CD34+ [Gene ID=947] cells isolated from t   | 0 | 8126  | 1343 |
| Perturbation   | Genes constituting the BRCA1-PCC network of transcripts whose     | 0 | 8632  | 1514 |
|                | Genes up-regulated in brain from patients with Alzheimer's dise   | 0 | 10110 | 1534 |
|                | Genes whose promoters are bound by MYC [Gene ID=4609], acc        | 0 | 5290  | 986  |
|                | Genes up-regulated in liver tumor compared to the normal adjac    | 0 | 4155  | 774  |
|                | Genes whose promoters contain E-box motifs and whose expres       | 0 | 4225  | 717  |
|                | Set 'Nanog targets': genes upregulated and identified by ChIP on  | 0 | 5605  | 897  |
|                | Set 'Sox2 targets': genes upregulated and identified by ChIP on c | 0 | 4434  | 676  |
|                | Genes down-regulated in PC3 cells (prostate cancer) after knock   | 0 | 5220  | 721  |
|                | Set 'Myc targets2': targets of c-Myc [Gene ID=4609] and Max [G    | 0 | 3753  | 725  |

The test set of 74,577 genomic regions picked 16,773 genes (83%) of all 20,221 genes.

GO Molecular Function has 3,254 terms covering 15,499 (77%) of all 20,221 genes.

GO Biological Process has 8,583 terms covering 15,210 (75%) of all 20,221 genes.

Mouse Phenotype has 7,310 terms covering 6,642 (33%) of all 20,221 genes.

MGI Expression: Detected has 8,374 terms covering 12,066 (60%) of all 20,221 genes.

MSigDB Perturbation has 2,374 terms covering 15,669 (77%) of all 20,221 genes.

## ALL EPISC CLUSTERS

|              |                                                             |           |      |     |
|--------------|-------------------------------------------------------------|-----------|------|-----|
| GO Molecular | sequence-specific DNA binding                               | 1.02E-261 | 2372 | 530 |
| Function     | sequence-specific DNA binding transcription factor activity | 1.04E-260 | 2743 | 654 |
|              | nucleic acid binding transcription factor activity          | 1.05E-258 | 2745 | 655 |

|                |                                                                  |           |      |     |
|----------------|------------------------------------------------------------------|-----------|------|-----|
|                | regulatory region DNA binding                                    | 2.84E-123 | 1099 | 238 |
|                | transcription regulatory region DNA binding                      | 1.91E-120 | 1067 | 230 |
|                | protein binding transcription factor activity                    | 1.73E-94  | 972  | 249 |
|                | transcription factor binding transcription factor activity       | 5.66E-93  | 949  | 243 |
|                | chromatin binding                                                | 3.67E-92  | 883  | 204 |
|                | transcription cofactor activity                                  | 1.11E-87  | 910  | 233 |
|                | sequence-specific DNA binding RNA polymerase II transcription f  | 3.92E-65  | 571  | 116 |
| GO Biological  | embryo development                                               | 7.61E-278 | 2939 | 721 |
| Process        | negative regulation of gene expression                           | 2.05E-229 | 2541 | 633 |
|                | negative regulation of transcription, DNA-dependent              | 7.10E-210 | 2525 | 629 |
|                | embryonic morphogenesis                                          | 2.35E-191 | 1800 | 405 |
|                | chordate embryonic development                                   | 5.61E-179 | 1804 | 440 |
|                | embryo development ending in birth or egg hatching               | 1.21E-178 | 1826 | 446 |
|                | epithelium development                                           | 8.60E-157 | 1779 | 404 |
|                | pattern specification process                                    | 1.16E-153 | 1503 | 344 |
|                | negative regulation of transcription from RNA polymerase II prom | 4.64E-142 | 1532 | 355 |
|                | tissue morphogenesis                                             | 2.14E-141 | 1555 | 351 |
|                | negative regulation of developmental process                     | 3.29E-137 | 1538 | 348 |
|                | embryonic organ development                                      | 3.08E-134 | 1251 | 281 |
|                | negative regulation of cell differentiation                      | 7.58E-126 | 1288 | 290 |
|                | regionalization                                                  | 1.24E-124 | 1098 | 251 |
| Mouse          | abnormal embryonic tissue morphology                             | 5.16E-287 | 2915 | 695 |
| Phenotype      | embryonic lethality during organogenesis                         | 1.08E-253 | 2755 | 691 |
|                | complete embryonic lethality during organogenesis                | 6.30E-205 | 2221 | 558 |
|                | abnormal neural tube morphology/development                      | 8.58E-194 | 1828 | 419 |
|                | lethality throughout fetal growth and development                | 6.54E-160 | 1619 | 368 |
|                | abnormal neural tube closure                                     | 7.76E-129 | 1163 | 260 |
|                | abnormal neuron differentiation                                  | 1.93E-118 | 1254 | 259 |
|                | embryonic lethality between implantation and placentation        | 3.94E-116 | 1269 | 351 |
|                | partial embryonic lethality during organogenesis                 | 6.19E-115 | 1087 | 232 |
|                | abnormal cell proliferation                                      | 4.65E-111 | 1184 | 311 |
|                | abnormal heart development                                       | 3.79E-108 | 1231 | 274 |
| MGI Expression | TS23_male associated reproductive structure                      | 3.50E-303 | 3287 | 876 |

|              |                                                                   |           |      |     |
|--------------|-------------------------------------------------------------------|-----------|------|-----|
|              | TS21_embryo; head                                                 | 1.17E-283 | 2963 | 731 |
|              | TS23_early tubule                                                 | 2.27E-275 | 3035 | 832 |
|              | TS17_limb                                                         | 5.59E-272 | 2947 | 741 |
|              | TS17_brain                                                        | 4.82E-266 | 2723 | 645 |
|              | Theiler_stage_3                                                   | 3.39E-257 | 2841 | 782 |
|              | TS3_4-8 cell stage                                                | 1.26E-253 | 2767 | 758 |
|              | TS15_nervous system                                               | 1.67E-249 | 2356 | 517 |
|              | TS3_second polar body                                             | 6.82E-245 | 2727 | 755 |
|              | TS21_spinal cord                                                  | 1.09E-243 | 2632 | 685 |
|              | TS3_zona pellucida                                                | 5.11E-243 | 2708 | 749 |
| MSigDB       | Genes within amplicon 17q21-q25 identified in a copy number al    | 2.56E-239 | 934  | 291 |
| Perturbation | Genes with copy number losses in primary neuroblastoma tumo       | 5.21E-204 | 1886 | 632 |
|              | Genes with copy number gains in primary neuroblastoma tumor       | 5.30E-171 | 658  | 159 |
|              | Transcripts depleted from pseudopodia of NIH/3T3 cells (fibrobl   | 1.21E-165 | 1856 | 567 |
|              | Transcripts depleted in pseudopodia of NIH/3T3 cells (fibroblast) | 5.63E-156 | 1432 | 399 |
|              | Housekeeping genes identified as expressed across 19 normal tis   | 1.36E-120 | 978  | 322 |
|              | Genes up-regulated in NHEK cells (normal epidermal keratinocy     | 2.27E-119 | 1190 | 407 |
|              | Genes up-regulated in the MM1S cells (multiple myeloma) after     | 2.57E-114 | 1273 | 352 |
|              | The postradiation tumor escape signature: genes up-regulated ir   | 1.70E-109 | 1179 | 340 |
|              | Genes up-regulated in lymphoblastoid cells from the European p    | 7.15E-105 | 1062 | 379 |

The test set of 36,000 genomic regions picked 13,645 genes (67%) of all 20,221 genes.

GO Molecular Function has 3,254 terms covering 15,499 (77%) of all 20,221 genes.

GO Biological Process has 8,583 terms covering 15,210 (75%) of all 20,221 genes.

Mouse Phenotype has 7,310 terms covering 6,642 (33%) of all 20,221 genes.

MGI Expression: Detected has 8,374 terms covering 12,066 (60%) of all 20,221 genes.

MSigDB Perturbation has 2,374 terms covering 15,669 (77%) of all 20,221 genes.

## ALL NCS CLUSTERS

|              |                                                             |          |     |    |
|--------------|-------------------------------------------------------------|----------|-----|----|
| GO Molecular | beta-dystroglycan binding                                   | 2.28E-16 | 51  | 2  |
| Function     | transforming growth factor beta-activated receptor activity | 1.01E-13 | 128 | 14 |
|              | semaphorin receptor activity                                | 1.13E-13 | 85  | 5  |
|              | L-ascorbic acid binding                                     | 5.26E-13 | 119 | 16 |
|              | phosphatidylinositol-3,4,5-trisphosphate binding            | 8.08E-13 | 117 | 14 |
|              | histone kinase activity (H3-T6 specific)                    | 2.98E-12 | 39  | 2  |

|                       |                                                                  |          |     |    |
|-----------------------|------------------------------------------------------------------|----------|-----|----|
|                       | stem cell factor receptor binding                                | 5.29E-12 | 56  | 3  |
|                       | histone kinase activity                                          | 6.65E-12 | 93  | 12 |
| GO Biological Process | positive regulation of myoblast differentiation                  | 6.09E-27 | 131 | 9  |
|                       | peptidyl-threonine modification                                  | 1.24E-20 | 197 | 22 |
|                       | negative regulation of epithelial cell migration                 | 6.49E-20 | 54  | 3  |
|                       | B cell receptor signaling pathway                                | 2.90E-19 | 190 | 21 |
|                       | peptidyl-threonine phosphorylation                               | 6.08E-19 | 174 | 20 |
|                       | histone phosphorylation                                          | 8.63E-18 | 131 | 15 |
|                       | negative regulation of axon extension                            | 1.18E-17 | 141 | 11 |
|                       | regulation of neuron maturation                                  | 4.86E-17 | 62  | 3  |
|                       | negative regulation of neuron maturation                         | 3.12E-16 | 51  | 2  |
|                       | axonal fasciculation                                             | 2.40E-15 | 133 | 13 |
| Mouse Phenotype       | synechia                                                         | 7.12E-30 | 208 | 16 |
|                       | dilated respiratory conducting tubes                             | 9.53E-23 | 232 | 21 |
|                       | abnormal foot pigmentation                                       | 7.25E-19 | 178 | 19 |
|                       | increased wet-to-dry lung weight ratio                           | 1.20E-17 | 66  | 4  |
|                       | abnormal terminal bronchiole morphology                          | 3.44E-17 | 141 | 12 |
|                       | decreased circulating interferon-beta level                      | 1.64E-16 | 72  | 6  |
|                       | abnormal circulating interferon-beta level                       | 5.74E-15 | 79  | 8  |
|                       | corneal adhesion to iris                                         | 3.95E-13 | 100 | 8  |
| MGI Expression        | TS24_tooth; mesenchyme; dental papilla                           | 8.76E-24 | 98  | 6  |
|                       | TS26_upper jaw                                                   | 3.33E-23 | 220 | 19 |
|                       | TS19_gut; associated mesenchyme                                  | 1.14E-19 | 63  | 3  |
|                       | TS20_arch of aorta                                               | 5.56E-19 | 73  | 7  |
|                       | TS19_trunk mesenchyme; mesenchyme derived from neural cre        | 3.00E-18 | 135 | 10 |
|                       | TS24_tooth; mesenchyme                                           | 3.84E-18 | 98  | 6  |
|                       | TS23_endolymphatic duct                                          | 4.49E-18 | 139 | 11 |
|                       | TS25_cerebral cortex; subventricular zone                        | 1.47E-17 | 137 | 12 |
|                       | TS15_trunk mesenchyme; mesenchyme derived from neural cre        | 4.49E-17 | 156 | 13 |
|                       | TS23_epithelium of degenerating rest of paramesonephric duct     | 3.77E-16 | 55  | 4  |
| MSigDB Perturbation   | Genes down-regulated in glioblastoma cell lines displaying spher | 2.77E-25 | 234 | 24 |
|                       | Selected genes implicated in metastasis and epithelial-to-mesen  | 1.36E-22 | 169 | 12 |
|                       | Genes down-regulated in Kasumi-1 cells (acute myeloid leukaem    | 1.01E-21 | 191 | 17 |
|                       | Genes down-regulated in CD34+ [Gene ID=947] hematopoetic ce      | 1.22E-21 | 202 | 21 |

|                                                                   |          |     |    |
|-------------------------------------------------------------------|----------|-----|----|
| EMT (epithelial-mesenchymal transition) genes up-regulated ger    | 2.04E-20 | 214 | 26 |
| Genes up-regulated in glioblastoma cell lines displaying spherica | 2.38E-20 | 181 | 19 |
| Genes significantly mutated in 91 glioblastoma samples.           | 3.47E-19 | 95  | 7  |
| Examples of transcription factors whose activities are regulated  | 8.58E-19 | 100 | 7  |
| Genes up-regulated during prostate cancer progression in mice b   | 1.81E-16 | 169 | 20 |
| Genes highly expressed in the neonatal hippocampus (clusters 4    | 2.37E-16 | 118 | 14 |

The test set of 81,248 genomic regions picked 14,656 genes (72%) of all 20,221 genes.

GO Molecular Function has 3,254 terms covering 15,499 (77%) of all 20,221 genes.

GO Biological Process has 8,583 terms covering 15,210 (75%) of all 20,221 genes.

Mouse Phenotype has 7,310 terms covering 6,642 (33%) of all 20,221 genes.

MGI Expression: Detected has 8,374 terms covering 12,066 (60%) of all 20,221 genes.

MSigDB Perturbation has 2,374 terms covering 15,669 (77%) of all 20,221 genes.

## ALL MEF CLUSTERS

|               |                                                                     |          |     |    |
|---------------|---------------------------------------------------------------------|----------|-----|----|
| GO Molecular  | growth factor binding                                               | 6.29E-47 | 484 | 83 |
| Function      | insulin-like growth factor binding                                  | 1.12E-34 | 169 | 23 |
|               | extracellular matrix structural constituent                         | 9.16E-26 | 174 | 26 |
|               | lipase inhibitor activity                                           | 6.62E-14 | 55  | 7  |
|               | platelet-derived growth factor binding                              | 1.48E-13 | 72  | 10 |
|               | histone acetyltransferase binding                                   | 1.34E-11 | 74  | 14 |
|               | phosphatidylinositol 3-kinase binding                               | 3.10E-11 | 101 | 18 |
| GO Biological | negative regulation of MAPKKK cascade                               | 1.61E-21 | 230 | 44 |
| Process       | collagen fibril organization                                        | 3.83E-20 | 154 | 24 |
|               | positive regulation of vesicle fusion                               | 3.29E-17 | 52  | 4  |
|               | regulation of epithelial cell proliferation involved in lung morphc | 1.79E-16 | 67  | 6  |
|               | endothelial cell migration                                          | 1.85E-15 | 150 | 29 |
|               | mesenchymal-epithelial cell signaling                               | 8.38E-15 | 80  | 9  |
|               | positive regulation of smooth muscle cell proliferation             | 1.56E-14 | 150 | 35 |
|               | regulation of vesicle fusion                                        | 2.37E-14 | 54  | 6  |
|               | negative regulation of endothelial cell proliferation               | 3.71E-14 | 85  | 15 |
|               | actin filament bundle assembly                                      | 1.04E-13 | 115 | 20 |
| Mouse         | abnormal wound healing                                              | 7.09E-37 | 400 | 85 |
| Phenotype     | abnormal cell adhesion                                              | 1.22E-27 | 250 | 44 |
|               | corneal thinning                                                    | 4.05E-26 | 117 | 15 |

|                |                                                                    |           |      |     |
|----------------|--------------------------------------------------------------------|-----------|------|-----|
|                | abnormal pulmonary artery morphology                               | 1.21E-24  | 185  | 32  |
|                | abnormal semilunar valve morphology                                | 3.42E-23  | 247  | 49  |
|                | small placenta                                                     | 1.02E-22  | 237  | 51  |
|                | abnormal bronchiole morphology                                     | 2.70E-22  | 229  | 35  |
|                | abnormal lung alveolus development                                 | 3.30E-22  | 219  | 39  |
|                | impaired lung alveolus development                                 | 3.53E-22  | 218  | 38  |
|                | impaired wound healing                                             | 8.53E-22  | 176  | 36  |
| MGI Expression | TS22_pancreas; mesenchyme                                          | 3.65E-43  | 298  | 48  |
|                | TS28_tendon                                                        | 1.47E-37  | 167  | 17  |
|                | TS28_tendo calcaneus                                               | 4.42E-30  | 117  | 12  |
|                | TS20_arterial system                                               | 3.70E-29  | 298  | 50  |
|                | TS26_upper jaw                                                     | 6.74E-28  | 156  | 19  |
|                | TS20_dorsal aorta                                                  | 4.64E-25  | 253  | 42  |
|                | TS21_inner ear; associated mesenchyme                              | 5.38E-23  | 91   | 9   |
|                | TS13_trunk mesenchyme; paraxial mesenchyme; somite                 | 1.19E-21  | 231  | 39  |
|                | TS20_lung; associated mesenchyme                                   | 4.25E-21  | 195  | 30  |
|                | TS21_otic capsule                                                  | 5.73E-21  | 153  | 25  |
| MSigDB         | Genes down-regulated in luminal-like breast cancer cell lines cor  | 2.10E-207 | 2124 | 379 |
| Perturbation   | Genes commonly down-regulated in human alveolar rhabdomyo          | 1.80E-174 | 1704 | 341 |
|                | Up-regulated genes in angioimmunoblastic lymphoma (AILT) cor       | 6.99E-124 | 1013 | 159 |
|                | Genes down-regulated in UB27 cells (osteosarcoma) at 12 hr aft     | 1.66E-76  | 847  | 169 |
|                | Up-regulated genes distinguishing between two subtypes of gast     | 3.46E-75  | 799  | 133 |
|                | Genes whose expression positively correlated with sensitivity of   | 4.01E-67  | 460  | 58  |
|                | Genes down-regulated in primary fibroblast cell culture after infi | 1.57E-66  | 666  | 126 |
|                | Genes down-regulated in NIH3T3 cells (fibroblasts) after treatme   | 3.05E-59  | 346  | 45  |
|                | Genes up-regulated in lobular carcinoma vs normal ductal breast    | 1.84E-56  | 390  | 57  |
|                | Down-regulated at 24 h following infection of primary human fo     | 1.49E-49  | 326  | 51  |

## ESC SPECIFIC CLUSTERS

|              |                                             |           |      |     |
|--------------|---------------------------------------------|-----------|------|-----|
| GO Molecular | regulatory region DNA binding               | 2.34E-130 | 1342 | 246 |
| Function     | transcription regulatory region DNA binding | 7.50E-125 | 1295 | 237 |
|              | small GTPase regulator activity             | 1.64E-100 | 1099 | 208 |
|              | protein C-terminus binding                  | 6.33E-60  | 529  | 108 |
|              | phosphatidylinositol binding                | 3.14E-58  | 576  | 107 |

|                       |                                                                 |           |      |      |
|-----------------------|-----------------------------------------------------------------|-----------|------|------|
|                       | kinase regulator activity                                       | 1.40E-47  | 454  | 93   |
|                       | beta-catenin binding                                            | 7.06E-36  | 298  | 46   |
| GO Biological Process | protein complex subunit organization                            | 2.90E-134 | 1515 | 333  |
|                       | in utero embryonic development                                  | 3.00E-134 | 1393 | 271  |
|                       | protein complex assembly                                        | 6.66E-133 | 1481 | 323  |
|                       | protein complex biogenesis                                      | 2.78E-132 | 1483 | 325  |
|                       | lipid biosynthetic process                                      | 3.15E-123 | 1342 | 295  |
|                       | posttranscriptional regulation of gene expression               | 1.74E-105 | 1018 | 227  |
|                       | histone modification                                            | 7.74E-92  | 864  | 181  |
|                       | covalent chromatin modification                                 | 9.23E-78  | 874  | 183  |
|                       | homeostasis of number of cells                                  | 4.41E-77  | 623  | 119  |
|                       | stem cell maintenance                                           | 9.40E-69  | 396  | 53   |
| Mouse Phenotype       | prenatal growth retardation                                     | 1.96E-224 | 2338 | 441  |
|                       | decreased embryo size                                           | 1.04E-215 | 2448 | 470  |
|                       | lethality throughout fetal growth and development               | 1.53E-199 | 2080 | 375  |
|                       | embryonic growth retardation                                    | 2.70E-198 | 2067 | 390  |
|                       | abnormal erythrocyte morphology                                 | 3.40E-182 | 1990 | 407  |
|                       | embryonic lethality between implantation and placentation       | 1.09E-176 | 1729 | 342  |
|                       | abnormal placenta morphology                                    | 1.85E-146 | 1585 | 314  |
|                       | abnormal cell proliferation                                     | 6.06E-146 | 1545 | 313  |
|                       | abnormal neural tube closure                                    | 6.41E-146 | 1450 | 262  |
|                       | embryonic lethality before somite formation                     | 1.93E-141 | 1281 | 250  |
| MGI Expression        | Theiler_stage_4                                                 | 0         | 4783 | 949  |
|                       | TS4_embryo                                                      | 0         | 4756 | 939  |
|                       | Theiler_stage_5                                                 | 0         | 4784 | 932  |
|                       | TS4_extraembryonic component                                    | 0         | 4465 | 890  |
|                       | TS28_female germ cell                                           | 0         | 4408 | 910  |
|                       | Theiler_stage_2                                                 | 0         | 4077 | 838  |
|                       | TS4_inner cell mass                                             | 0         | 3965 | 774  |
|                       | TS4_compacted morula                                            | 0         | 3461 | 680  |
|                       | TS5_embryo                                                      | 0         | 3459 | 639  |
|                       | TS3_4-8 cell stage                                              | 0         | 3957 | 780  |
| MSigDB                | Genes constituting the BRCA1-PCC network of transcripts whose   | 0         | 5328 | 1277 |
| Perturbation          | Genes down-regulated in PC3 cells (prostate cancer) after knock | 0         | 3201 | 638  |



|                                                                                                                           |           |      |      |
|---------------------------------------------------------------------------------------------------------------------------|-----------|------|------|
| Genes up-regulated in brain from patients with Alzheimer's disease                                                        | 0         | 6171 | 1301 |
| Transcripts depleted from pseudopodia of NIH/3T3 cells (fibroblasts)                                                      | 0         | 2822 | 583  |
| Genes up-regulated in HeLa cells (cervical cancer) after simultaneous treatment with doxorubicin and interferon- $\gamma$ | 2.27E-288 | 2844 | 660  |
| Genes up-regulated in T24 (bladder cancer) cells in response to treatment with interferon- $\gamma$                       | 1.03E-285 | 3224 | 657  |
| Set 'Sox2 targets': genes upregulated and identified by CHIP on chromatin                                                 | 7.22E-268 | 2729 | 557  |
| Up-regulated genes in colon carcinoma tumors compared to the normal colon                                                 | 3.66E-264 | 2259 | 538  |
| Genes constituting the CHEK2-PCC network of transcripts whose expression is down-regulated in colon cancer                | 2.01E-250 | 2585 | 612  |
| Genes down-regulated in HL-60 cells (acute promyelocytic leukemia)                                                        | 3.43E-249 | 2736 | 665  |

The test set of 52,148 genomic regions picked 14,749 genes (73%) of all 20,221 genes.

GO Molecular Function has 3,254 terms covering 15,499 (77%) of all 20,221 genes.

GO Biological Process has 8,583 terms covering 15,210 (75%) of all 20,221 genes.

Mouse Phenotype has 7,310 terms covering 6,642 (33%) of all 20,221 genes.

MGI Expression: Detected has 8,374 terms covering 12,066 (60%) of all 20,221 genes.

MSigDB Perturbation has 2,374 terms covering 15,669 (77%) of all 20,221 genes.

## EPISC SPECIFIC CLUSTERS

|                          |                                                                                  |          |     |     |
|--------------------------|----------------------------------------------------------------------------------|----------|-----|-----|
| GO Molecular<br>Function | sequence-specific DNA binding                                                    | 8.95E-94 | 849 | 360 |
|                          | regulatory region DNA binding                                                    | 1.31E-35 | 366 | 155 |
|                          | transcription regulatory region DNA binding                                      | 2.04E-34 | 354 | 150 |
|                          | transcription regulatory region sequence-specific DNA binding                    | 8.39E-24 | 153 | 53  |
|                          | sequence-specific DNA binding RNA polymerase II transcription factor             | 5.18E-21 | 195 | 81  |
|                          | sequence-specific distal enhancer binding RNA polymerase II transcription factor | 4.13E-13 | 118 | 50  |
|                          | DNA bending activity                                                             | 1.60E-12 | 83  | 36  |
| GO Biological<br>Process | embryonic morphogenesis                                                          | 1.05E-64 | 632 | 264 |
|                          | pattern specification process                                                    | 4.20E-62 | 557 | 232 |
|                          | regionalization                                                                  | 3.64E-54 | 417 | 162 |
|                          | negative regulation of developmental process                                     | 1.14E-52 | 560 | 238 |
|                          | negative regulation of cell differentiation                                      | 2.41E-46 | 463 | 198 |
|                          | anterior/posterior pattern specification                                         | 4.55E-45 | 304 | 114 |
|                          | embryonic organ development                                                      | 1.63E-39 | 420 | 182 |
|                          | embryonic organ morphogenesis                                                    | 8.59E-33 | 303 | 123 |
|                          | cell fate commitment                                                             | 2.68E-32 | 297 | 120 |
| axon guidance            | 3.36E-31                                                                         | 244      | 85  |     |

|                    |                                        |          |          |     |
|--------------------|----------------------------------------|----------|----------|-----|
| Mouse<br>Phenotype | abnormal neuron differentiation        | 9.96E-45 | 454      | 177 |
|                    | partial neonatal lethality             | 5.78E-40 | 430      | 179 |
|                    | abnormal nervous system tract          | 7.09E-38 | 282      | 96  |
|                    | complete perinatal lethality           | 4.56E-36 | 375      | 152 |
|                    | abnormal forebrain development         | 4.12E-34 | 299      | 111 |
|                    | abnormal diencephalon morphology       | 6.18E-34 | 348      | 132 |
|                    | abnormal eye development               | 2.39E-32 | 326      | 136 |
|                    | abnormal brain white matter morphology | 8.91E-31 | 269      | 98  |
|                    | abnormal olfactory lobe morphology     | 4.89E-30 | 246      | 84  |
|                    | abnormal brain commissure morphology   | 5.68E-30 | 231      | 81  |
| MGI Expression     | TS17_brain                             | 2.36E-91 | 963      | 431 |
|                    | TS15_nervous system                    | 6.65E-76 | 803      | 328 |
|                    | TS15_central nervous system            | 5.60E-70 | 766      | 314 |
|                    | TS28_head                              | 6.66E-69 | 701      | 289 |
|                    | TS21_diencephalon                      | 1.68E-67 | 657      | 256 |
|                    | TS15_embryo; mesenchyme                | 3.33E-63 | 651      | 268 |
|                    | TS15_future brain                      | 2.91E-62 | 622      | 247 |
|                    | Theiler_stage_12                       | 8.24E-59 | 589      | 250 |
|                    | TS12_embryo                            | 1.68E-57 | 565      | 240 |
|                    | TS17_midbrain                          | 7.73E-57 | 498      | 184 |
|                    | TS21_thalamus                          | 3.07E-56 | 540      | 214 |
|                    | TS15_trunk mesenchyme                  | 9.36E-53 | 538      | 222 |
|                    | TS17_hindbrain                         | 1.25E-52 | 520      | 201 |
|                    | TS21_midbrain                          | 1.81E-51 | 537      | 216 |
|                    | TS21_hypothalamus                      | 3.66E-50 | 465      | 179 |
|                    | TS15_future spinal cord                | 1.32E-49 | 442      | 174 |
|                    | TS15_eye                               | 3.92E-47 | 377      | 149 |
|                    | TS15_future spinal cord; neural tube   | 7.22E-46 | 392      | 153 |
|                    | TS13_future brain                      | 9.11E-27 | 286      | 113 |
|                    | TS15_1st arch; maxillary component     | 9.95E-27 | 255      | 109 |
|                    | TS14_embryo; mesenchyme                | 9.93E-26 | 225      | 81  |
|                    | Theiler_stage_8                        | 2.17E-24 | 201      | 77  |
|                    | TS8_embryo                             | 5.77E-23 | 1.61E+02 | 61  |

|              |                                                                   |          |     |     |
|--------------|-------------------------------------------------------------------|----------|-----|-----|
| MSigDB       | Set 'PRC2 targets': Polycomb Repression Complex 2 (PRC) target:   | 7.86E-86 | 848 | 353 |
| Perturbation | Genes within amplicon 17q21-q25 identified in a copy number al    | 2.86E-61 | 288 | 183 |
|              | Genes with copy number gains in primary neuroblastoma tumor       | 3.91E-26 | 164 | 89  |
|              | Genes bearing H3K27me3 mark or whose promoters are bound l        | 4.80E-19 | 135 | 51  |
|              | Genes with high histone H3 trimethylation mark at K27 (H3K27r     | 1.58E-15 | 128 | 50  |
|              | Genes down-regulated in SCC12B2 cells (squamous cell carcinom     | 1.76E-14 | 133 | 56  |
|              | Genes within amplicon 17q11-q21 identified in a copy number al    | 2.95E-14 | 76  | 56  |
|              | Genes down-regulated in primary fibroblast cell culture after inf | 5.39E-14 | 137 | 53  |
|              | The 'stemnes' signature: genes up-regulated and common to 6 h     | 1.16E-08 | 76  | 38  |

The test set of 12,966 genomic regions picked 7,419 genes (37%) of all 20,221 genes.

GO Molecular Function has 3,254 terms 3,254 ontology terms were tested (100%) using an annotation count range of [1, Inf].

GO Biological Process has 8,583 terms cc 8,583 ontology terms were tested (100%) using an annotation count range of [1, Inf].

Mouse Phenotype has 7,310 terms cove 7,310 ontology terms were tested (100%) using an annotation count range of [1, Inf].

MGI Expression: Detected has 8,374 terr 8,374 ontology terms were tested (100%) using an annotation count range of [1, Inf].

MSigDB Perturbation has 2,374 terms cc 2,374 ontology terms were tested (100%) using an annotation count range of [1, Inf].

## ESC EPISC SHARED CLUSTERS

|                                                              |                                                                 |                                               |           |      |      |
|--------------------------------------------------------------|-----------------------------------------------------------------|-----------------------------------------------|-----------|------|------|
| GO Molecular<br>Function                                     | nucleic acid binding                                            | 6.34E-228                                     | 2019      | 1143 |      |
|                                                              | DNA binding                                                     | 1.93E-204                                     | 1489      | 785  |      |
|                                                              | sequence-specific DNA binding                                   | 6.54E-143                                     | 746       | 345  |      |
|                                                              | sequence-specific DNA binding transcription factor activity     | 2.32E-135                                     | 832       | 396  |      |
|                                                              | nucleic acid binding transcription factor activity              | 2.21E-134                                     | 832       | 396  |      |
|                                                              | regulatory region DNA binding                                   | 1.34E-70                                      | 353       | 152  |      |
|                                                              | transcription regulatory region DNA binding                     | 5.39E-69                                      | 343       | 148  |      |
|                                                              | protein domain specific binding                                 | 1.14E-46                                      | 413       | 214  |      |
|                                                              | transcription factor binding                                    | 6.57E-45                                      | 309       | 154  |      |
|                                                              | transcription regulatory region sequence-specific DNA binding   | 4.48E-43                                      | 153       | 57   |      |
|                                                              | sequence-specific DNA binding RNA polymerase II transcription f | 8.48E-42                                      | 192       | 78   |      |
|                                                              | GO Biological<br>Process                                        | regulation of cellular metabolic process      | 3.43E-288 | 2658 | 1528 |
|                                                              |                                                                 | regulation of macromolecule metabolic process | 2.09E-272 | 2499 | 1426 |
| regulation of nitrogen compound metabolic process            |                                                                 | 1.65E-257                                     | 2290      | 1273 |      |
| regulation of nucleobase-containing compound metabolic proce |                                                                 | 5.85E-256                                     | 2275      | 1264 |      |
| nitrogen compound metabolic process                          |                                                                 | 4.79E-246                                     | 2359      | 1447 |      |
| regulation of cellular biosynthetic process                  | 9.02E-245                                                       | 2165                                          | 1207      |      |      |

|                |                                                           |           |      |      |
|----------------|-----------------------------------------------------------|-----------|------|------|
|                | regulation of biosynthetic process                        | 3.33E-244 | 2175 | 1213 |
|                | cellular nitrogen compound metabolic process              | 1.27E-242 | 2313 | 1408 |
|                | regulation of gene expression                             | 8.98E-242 | 2135 | 1186 |
|                | regulation of cellular macromolecule biosynthetic process | 2.71E-238 | 2062 | 1133 |
|                | regulation of macromolecule biosynthetic process          | 7.30E-238 | 2084 | 1149 |
| Mouse          | abnormal nervous system morphology                        | 1.08E-165 | 1653 | 898  |
| Phenotype      | lethality during fetal growth through weaning             | 3.68E-157 | 1614 | 878  |
|                | prenatal lethality                                        | 6.49E-155 | 1411 | 791  |
|                | abnormal embryogenesis/ development                       | 1.92E-143 | 1221 | 648  |
|                | abnormal nervous system development                       | 8.79E-117 | 946  | 458  |
|                | abnormal embryonic tissue morphology                      | 1.45E-113 | 806  | 390  |
|                | embryonic lethality                                       | 6.52E-111 | 1049 | 574  |
|                | no abnormal phenotype detected                            | 1.50E-107 | 1132 | 618  |
|                | normal phenotype                                          | 3.75E-107 | 1135 | 620  |
|                | abnormal brain morphology                                 | 3.18E-105 | 1068 | 568  |
|                | perinatal lethality                                       | 3.21E-102 | 1012 | 513  |
| MGI Expression | Theiler_stage_17                                          | 1.93E-298 | 2480 | 1379 |
|                | TS19_embryo                                               | 6.48E-254 | 2403 | 1381 |
|                | TS23_metanephros                                          | 3.87E-240 | 2182 | 1262 |
|                | Theiler_stage_15                                          | 1.49E-234 | 1796 | 950  |
|                | TS15_embryo                                               | 5.43E-229 | 1757 | 933  |
|                | TS17_nervous system                                       | 1.33E-228 | 1640 | 866  |
|                | TS23_reproductive system; male                            | 8.88E-184 | 1639 | 909  |
|                | TS28_spinal cord                                          | 7.00E-177 | 1765 | 1031 |
|                | Theiler_stage_13                                          | 2.54E-163 | 1221 | 613  |
|                | TS21_nervous system                                       | 6.86E-147 | 1631 | 928  |
|                | TS21_central nervous system                               | 4.21E-145 | 1254 | 647  |
|                | TS19_future spinal cord                                   | 7.10E-138 | 1306 | 735  |
|                | TS28_gastrointestinal system                              | 7.40E-127 | 1299 | 752  |
|                | TS21_brain                                                | 2.93E-124 | 1134 | 584  |
|                | TS22_gut                                                  | 4.76E-124 | 1182 | 646  |
|                | TS21_embryo; head                                         | 3.68E-123 | 844  | 429  |
|                | Theiler_stage_18                                          | 2.27E-117 | 1168 | 641  |
|                | TS18_embryo                                               | 9.34E-116 | 1160 | 637  |

|              |                                                                                             |           |      |     |
|--------------|---------------------------------------------------------------------------------------------|-----------|------|-----|
|              | TS19_midbrain                                                                               | 1.14E-114 | 1175 | 661 |
|              | TS15_nervous system                                                                         | 1.39E-114 | 691  | 318 |
|              | TS20_nervous system                                                                         | 1.60E-114 | 1000 | 524 |
|              | TS22_sensory organ                                                                          | 7.63E-113 | 1125 | 616 |
|              | TS4_embryo                                                                                  | 9.29E-108 | 878  | 471 |
|              | Theiler_stage_4                                                                             | 1.65E-106 | 879  | 472 |
| MSigDB       | Set 'H3K27 bound': genes possessing the trimethylated H3K27 (H3K27me3)                      | 8.48E-126 | 1005 | 497 |
| Perturbation | Genes up-regulated in brain from patients with Alzheimer's disease                          | 1.12E-123 | 1150 | 656 |
|              | Set 'Eed targets': genes identified by ChIP on chip as targets of Eed                       | 2.17E-106 | 909  | 451 |
|              | Set 'Suz12 targets': genes identified by ChIP on chip as targets of Suz12                   | 1.75E-101 | 920  | 455 |
|              | Genes up-regulated in the HMEC cells (primary mammary epithelial cells)                     | 2.20E-99  | 817  | 450 |
|              | Set 'PRC2 targets': Polycomb Repression Complex 2 (PRC2) targets                            | 4.03E-97  | 662  | 314 |
|              | Genes with copy number losses in primary neuroblastoma tumors                               | 2.75E-58  | 469  | 309 |
|              | Set 'Sox2 targets': genes upregulated and identified by ChIP on chip as targets of Sox2     | 1.95E-56  | 514  | 272 |
|              | Genes up-regulated in luminal-like breast cancer cell lines compared to normal breast cells | 6.11E-50  | 325  | 173 |
|              | Set 'ES exp1': genes overexpressed in human embryonic stem cells                            | 1.00E-49  | 332  | 175 |

The test set of 8,508 genomic regions picked 6,503 genes (32%) of all 20,221 genes.

GO Molecular Function has 3,254 terms cc 3,254 ontology terms were tested (100%) using an annotation count range of [1, Inf].

GO Biological Process has 8,583 terms cc 8,583 ontology terms were tested (100%) using an annotation count range of [1, Inf].

Mouse Phenotype has 7,310 terms cove 7,310 ontology terms were tested (100%) using an annotation count range of [1, Inf].

MGI Expression: Detected has 8,374 terr 8,374 ontology terms were tested (100%) using an annotation count range of [1, Inf].

MSigDB Perturbation has 2,374 terms cc 2,374 ontology terms were tested (100%) using an annotation count range of [1, Inf].

## NSC SPECIFIC CLUSTERS

|              |                                             |          |    |   |
|--------------|---------------------------------------------|----------|----|---|
| GO Molecular | beta-dystroglycan binding                   | 2.91E-14 | 38 | 2 |
| Function     | endothelin-B receptor activity              | 8.73E-14 | 27 | 1 |
|              | glyceryl-ether monooxygenase activity       | 3.59E-12 | 25 | 1 |
|              | 3',5'-cyclic-AMP phosphodiesterase activity | 7.50E-12 | 80 | 7 |
|              | endothelin receptor activity                | 2.08E-11 | 34 | 2 |
|              | calcium channel regulator activity          | 4.65E-11 | 77 | 8 |
|              | semaphorin receptor activity                | 1.76E-10 | 58 | 5 |
|              | cytoskeletal regulatory protein binding     | 3.43E-10 | 32 | 1 |
|              | histone kinase activity (H3-T6 specific)    | 4.37E-10 | 28 | 2 |

|                                                                  |                                                                   |          |     |    |
|------------------------------------------------------------------|-------------------------------------------------------------------|----------|-----|----|
| GO Biological Process                                            | stem cell factor receptor binding                                 | 4.70E-10 | 40  | 3  |
|                                                                  | positive regulation of myoblast differentiation                   | 7.87E-19 | 87  | 8  |
|                                                                  | neurotransmitter-gated ion channel clustering                     | 1.44E-17 | 45  | 2  |
|                                                                  | receptor localization to synapse                                  | 1.44E-17 | 45  | 2  |
|                                                                  | regulation of neuron maturation                                   | 1.77E-17 | 50  | 3  |
|                                                                  | neuron cell-cell adhesion                                         | 8.35E-17 | 63  | 4  |
|                                                                  | B cell receptor signaling pathway                                 | 2.05E-16 | 134 | 16 |
|                                                                  | peptidyl-threonine modification                                   | 4.09E-16 | 135 | 17 |
|                                                                  | presynaptic membrane assembly                                     | 3.78E-15 | 45  | 2  |
|                                                                  | peptidyl-threonine phosphorylation                                | 4.57E-15 | 120 | 15 |
| Mouse Phenotype                                                  | calcium-dependent cell-cell adhesion                              | 6.23E-15 | 82  | 9  |
|                                                                  | synechia                                                          | 6.48E-19 | 133 | 16 |
|                                                                  | abnormal vertical vestibuloocular reflex                          | 4.38E-18 | 32  | 1  |
|                                                                  | dilated respiratory conducting tubes                              | 8.45E-17 | 156 | 17 |
|                                                                  | abnormal cochlear IHC efferent innervation pattern                | 1.08E-12 | 62  | 6  |
|                                                                  | decreased maxillary shelf size                                    | 1.08E-12 | 77  | 7  |
|                                                                  | decreased circulating interferon-beta level                       | 2.51E-12 | 49  | 5  |
|                                                                  | abnormal iridocorneal angle                                       | 7.45E-12 | 116 | 16 |
|                                                                  | abnormal foot pigmentation                                        | 8.63E-12 | 113 | 15 |
|                                                                  | optic nerve cupping                                               | 9.57E-12 | 41  | 3  |
| MGI Expression                                                   | TS25_thalamus                                                     | 1.33E-18 | 156 | 17 |
|                                                                  | TS19_trunk mesenchyme; mesenchyme derived from neural cre         | 1.72E-18 | 103 | 9  |
|                                                                  | TS23_endolymphatic duct                                           | 2.10E-18 | 106 | 10 |
|                                                                  | TS19_embryo; mesenchyme; mesenchyme derived from neural           | 7.03E-17 | 85  | 7  |
|                                                                  | TS15_trunk mesenchyme; mesenchyme derived from neural cre         | 9.83E-17 | 116 | 13 |
|                                                                  | TS25_cerebral cortex; subventricular zone                         | 1.83E-16 | 101 | 10 |
|                                                                  | TS25_spinal cord; lateral wall; mantle layer                      | 1.59E-14 | 47  | 3  |
| MSigDB Perturbation                                              | Genes up-regulated in glioblastoma cell lines displaying spherica | 6.48E-17 | 127 | 15 |
|                                                                  | Examples of transcription factors whose activities are regulated  | 4.84E-14 | 68  | 7  |
|                                                                  | Genes down-regulated in CD34+ [Gene ID=947] hematopoetic ce       | 5.16E-14 | 130 | 19 |
|                                                                  | Selected genes implicated in metastasis and epithelial-to-mesen   | 2.59E-13 | 105 | 11 |
|                                                                  | Genes down-regulated in Kasumi-1 cells (acute myeloid leukaem     | 3.70E-12 | 117 | 15 |
|                                                                  | Genes significantly mutated in 91 glioblastoma samples.           | 1.20E-11 | 59  | 6  |
| Examples of transcription factors whose activities are regulated | 4.68E-11                                                          | 64       | 7   |    |

|                                                                  |          |    |    |
|------------------------------------------------------------------|----------|----|----|
| Examples of transcription factors whose activities are regulated | 1.93E-10 | 46 | 4  |
| Genes highly expressed in the neonatal hippocampus (clusters 4   | 1.05E-09 | 73 | 13 |
| Genes specifically down-regulated in pediatric acute lymphoblas  | 2.38E-09 | 85 | 14 |

## MEF SPECIFIC CLUSTERS

|               |                                                                            |          |     |    |
|---------------|----------------------------------------------------------------------------|----------|-----|----|
| GO Molecular  | growth factor binding                                                      | 5.11E-25 | 259 | 65 |
| Function      | extracellular matrix structural constituent                                | 5.15E-21 | 109 | 23 |
|               | insulin-like growth factor binding                                         | 2.57E-13 | 78  | 15 |
|               | platelet-derived growth factor binding                                     | 6.87E-11 | 45  | 8  |
|               | hepatocyte growth factor-activated receptor activity                       | 1.02E-09 | 19  | 2  |
|               | protein-lysine 6-oxidase activity                                          | 7.27E-09 | 18  | 2  |
|               | collagen V binding                                                         | 4.69E-08 | 18  | 2  |
|               | phospholipase inhibitor activity                                           | 1.22E-07 | 28  | 5  |
|               | calcium-dependent phospholipid binding                                     | 1.82E-07 | 56  | 12 |
|               | Roundabout binding                                                         | 2.57E-07 | 21  | 4  |
| GO Biological | collagen fibril organization                                               | 8.87E-16 | 94  | 17 |
| Process       | luteolysis                                                                 | 2.96E-13 | 32  | 3  |
|               | myoblast proliferation                                                     | 1.72E-12 | 33  | 5  |
|               | positive regulation of vesicle fusion                                      | 7.20E-12 | 31  | 4  |
|               | regulation of branching involved in salivary gland morphogenesis           | 8.39E-12 | 39  | 6  |
|               | hepatocyte growth factor receptor signaling pathway                        | 1.28E-10 | 28  | 4  |
|               | mesenchymal-epithelial cell signaling                                      | 2.14E-10 | 47  | 9  |
|               | regulation of branching involved in salivary gland morphogenesis           | 1.56E-09 | 44  | 8  |
|               | regulation of vesicle fusion                                               | 1.94E-09 | 31  | 4  |
|               | regulation of epithelial cell proliferation involved in lung morphogenesis | 6.21E-09 | 35  | 6  |
| Mouse         | decreased corneal stroma thickness                                         | 6.72E-17 | 49  | 8  |
| Phenotype     | abnormal cutaneous collagen fibril morphology                              | 8.34E-17 | 75  | 11 |
|               | corneal thinning                                                           | 3.63E-15 | 64  | 13 |
|               | thin diaphragm muscle                                                      | 5.24E-15 | 88  | 16 |
|               | herniated diaphragm                                                        | 6.03E-14 | 68  | 12 |
|               | abnormal skin tensile strength                                             | 3.85E-13 | 74  | 14 |
|               | abnormal miniature inhibitory postsynaptic currents                        | 8.55E-13 | 60  | 11 |
|               | abnormal kidney corticomedullary boundary morphology                       | 1.24E-12 | 38  | 6  |
|               | abnormal motor neuron innervation                                          | 5.00E-12 | 105 | 23 |

|                |                                                                    |          |     |     |
|----------------|--------------------------------------------------------------------|----------|-----|-----|
| MGI Expression | TS28_tendon                                                        | 2.27E-22 | 93  | 16  |
|                | TS22_pancreas; mesenchyme                                          | 6.54E-22 | 156 | 37  |
|                | TS28_tendo calcaneus                                               | 2.39E-17 | 64  | 11  |
|                | TS21_perioptic mesenchyme                                          | 4.24E-15 | 40  | 6   |
|                | TS28_corpus luteum                                                 | 8.41E-13 | 56  | 10  |
|                | TS23_forelimb; skeleton                                            | 5.51E-12 | 46  | 9   |
|                | TS26_lower jaw; skeleton                                           | 2.62E-10 | 65  | 18  |
|                | TS28_ovary secondary follicle                                      | 4.86E-10 | 65  | 12  |
|                | TS26_cornea                                                        | 4.99E-10 | 84  | 24  |
|                | TS28_chondrocranium                                                | 9.71E-10 | 94  | 20  |
| MSigDB         | Up-regulated genes distinguishing between two subtypes of gast     | 8.29E-47 | 450 | 114 |
| Perturbation   | Up-regulated genes in angioimmunoblastic lymphoma (AILT) con       | 4.52E-43 | 477 | 128 |
|                | Genes down-regulated in primary fibroblast cell culture after infi | 4.03E-33 | 350 | 86  |
|                | Genes up-regulated in lobular carcinoma vs normal ductal breast    | 1.63E-31 | 212 | 46  |
|                | Selected genes down-regulated during invasion of lymphatic ves     | 1.38E-30 | 156 | 30  |
|                | Down-regulated at 24 h following infection of primary human fo     | 2.44E-29 | 181 | 35  |
|                | Genes down-regulated in lobular carcinoma vs normal lobular br     | 3.21E-29 | 200 | 48  |
|                | Down-regulated at any timepoint following infection of primary     | 3.16E-26 | 209 | 45  |
|                | Cluster 5: selected 17q21_23 amplicon genes clustered together     | 3.14E-25 | 96  | 13  |
|                | Genes whose expression positively correlated with sensitivity of   | 1.63E-24 | 216 | 52  |

The test set of 23,864 genomic regions picked 7,624 genes (38%) of all 20,221 genes.

GO Molecular Function has 3,254 terms 3,254 ontology terms were tested (100%) using an annotation count range of [1, Inf].

GO Biological Process has 8,583 terms cc 8,583 ontology terms were tested (100%) using an annotation count range of [1, Inf].

Mouse Phenotype has 7,310 terms cove 7,310 ontology terms were tested (100%) using an annotation count range of [1, Inf].

MGI Expression: Detected has 8,374 terr 8,374 ontology terms were tested (100%) using an annotation count range of [1, Inf].

MSigDB Perturbation has 2,374 terms cc 2,374 ontology terms were tested (100%) using an annotation count range of [1, Inf].

## COMMON TO ALL

|                          |                      |           |      |      |
|--------------------------|----------------------|-----------|------|------|
| GO Molecular<br>Function | nucleic acid binding | 1.71E-148 | 1164 | 1012 |
|                          | nucleotide binding   | 1.82E-87  | 869  | 750  |
|                          | DNA binding          | 4.64E-81  | 736  | 613  |
|                          | zinc ion binding     | 1.26E-67  | 665  | 549  |
|                          | RNA binding          | 3.93E-61  | 343  | 298  |
|                          | enzyme binding       | 2.50E-37  | 346  | 275  |



|                |                                                                 |           |      |      |
|----------------|-----------------------------------------------------------------|-----------|------|------|
|                | transferase activity, transferring phosphorus-containing groups | 1.33E-36  | 373  | 306  |
|                | hydrolase activity, acting on acid anhydrides                   | 4.48E-28  | 275  | 233  |
|                | phosphotransferase activity, alcohol group as acceptor          | 1.09E-27  | 290  | 232  |
|                | pyrophosphatase activity                                        | 1.91E-27  | 270  | 228  |
| GO Biological  | cellular metabolic process                                      | 0         | 2316 | 2142 |
| Process        | primary metabolic process                                       | 0         | 2291 | 2109 |
|                | metabolic process                                               | 0         | 2501 | 2347 |
|                | cellular macromolecule metabolic process                        | 5.32E-301 | 1881 | 1684 |
|                | macromolecule metabolic process                                 | 5.60E-298 | 1989 | 1792 |
|                | nitrogen compound metabolic process                             | 1.27E-211 | 1475 | 1281 |
|                | cellular nitrogen compound metabolic process                    | 6.82E-211 | 1452 | 1258 |
|                | nucleobase-containing compound metabolic process                | 1.45E-202 | 1360 | 1179 |
|                | nucleic acid metabolic process                                  | 4.37E-179 | 1171 | 1015 |
|                | regulation of cellular metabolic process                        | 1.08E-162 | 1468 | 1239 |
| Mouse          | preweaning lethality                                            | 1.20E-125 | 1218 | 1001 |
| Phenotype      | prenatal lethality                                              | 2.75E-118 | 856  | 704  |
|                | embryonic lethality                                             | 3.94E-104 | 682  | 551  |
|                | abnormal embryogenesis/ development                             | 2.45E-80  | 672  | 536  |
|                | cellular phenotype                                              | 5.08E-77  | 635  | 532  |
|                | abnormal cell physiology                                        | 4.68E-70  | 584  | 492  |
|                | abnormal blood cell morphology/development                      | 3.53E-62  | 634  | 504  |
|                | abnormal hematopoiesis                                          | 3.40E-60  | 624  | 499  |
|                | embryonic lethality during organogenesis                        | 2.44E-54  | 412  | 326  |
|                | abnormal prenatal growth/weight/body size                       | 4.50E-52  | 449  | 350  |
| MGI Expression | TS23_metanephros                                                | 1.02E-123 | 1174 | 965  |
|                | TS23_reproductive system                                        | 2.76E-107 | 1053 | 860  |
|                | TS23_urethra                                                    | 1.63E-96  | 735  | 583  |
|                | TS23_early tubule                                               | 5.74E-90  | 526  | 415  |
|                | TS4_embryo                                                      | 6.46E-88  | 549  | 438  |
|                | Theiler_stage_4                                                 | 1.10E-87  | 551  | 440  |
|                | Theiler_stage_5                                                 | 3.20E-87  | 548  | 436  |
|                | TS23_cap mesenchyme                                             | 1.31E-86  | 492  | 381  |
|                | TS4_extraembryonic component                                    | 8.98E-85  | 525  | 421  |
|                | TS23_renal cortex                                               | 1.09E-84  | 610  | 485  |

|              |                                                                  |           |     |     |
|--------------|------------------------------------------------------------------|-----------|-----|-----|
|              | TS23_renal interstitium                                          | 3.55E-83  | 535 | 413 |
| MSigDB       | Genes constituting the BRCA1-PCC network of transcripts whose    | 5.17E-123 | 711 | 617 |
| Perturbation | Genes up-regulated in brain from patients with Alzheimer's disea | 1.22E-111 | 738 | 587 |
|              | Genes whose promoters are bound by MYC [Gene ID=4609], acc       | 9.11E-99  | 482 | 415 |
|              | Genes up-regulated in CD34+ [Gene ID=947] cells isolated from l  | 1.58E-90  | 620 | 530 |
|              | Genes constituting the CHEK2-PCC network of transcripts whose    | 6.33E-80  | 382 | 322 |
|              | Genes down-regulated in nasopharyngeal carcinoma (NPC) comp      | 4.63E-76  | 545 | 475 |
|              | Set 'Myc targets2': targets of c-Myc [Gene ID=4609] and Max [G   | 3.05E-75  | 359 | 317 |
|              | Genes constituting the ATM-PCC network of transcripts whose e    | 8.55E-73  | 569 | 490 |
|              | Genes with copy number losses in primary neuroblastoma tumo      | 1.72E-71  | 344 | 317 |

The test set of 4,671 genomic regions picked 4,902 genes (24%) of all 20,221 genes.

GO Molecular Function has 3,254 terms 3,254 ontology terms were tested (100%) using an annotation count range of [1, Inf].

GO Biological Process has 8,583 terms cc 8,583 ontology terms were tested (100%) using an annotation count range of [1, Inf].

Mouse Phenotype has 7,310 terms cove 7,310 ontology terms were tested (100%) using an annotation count range of [1, Inf].

MGI Expression: Detected has 8,374 terr 8,374 ontology terms were tested (100%) using an annotation count range of [1, Inf].

MSigDB Perturbation has 2,374 terms cc 2,374 ontology terms were tested (100%) using an annotation count range of [1, Inf].
