# Supplementary material
Source: PubMed Central journal article supplement (PMC4304912)
Supplement: NIHMS635907-supplement-Supp_TableS9.pdf [file NIHMS635907-supplement-Supp_TableS9.pdf]

## A. NUMBER OF CLUSTERS IN EACH DATASET SHOWING OVERLAP WITH

|                       | total <sup>a</sup> | O <sup>b</sup> | S     | N    | O <sup>c</sup> _uniq | S_uniq | N_uniq | OSN <sup>d</sup> |
|-----------------------|--------------------|----------------|-------|------|----------------------|--------|--------|------------------|
| ALL_EPI_CLUSTERS      | 36000              | 7303           | 4802  | 3387 | 3618                 | 1142   | 481    | 2168             |
| ALL_ESC_CLUSTERS      | 74577              | 14855          | 10448 | 8105 | 7194                 | 2605   | 1615   | 4839             |
| ALL_MEF_CLUSTERS      | 43860              | 2815           | 1753  | 967  | 1649                 | 631    | 217    | 484              |
| ALL_NSC_CLUSTERS      | 81248              | 5540           | 3869  | 2422 | 2962                 | 1249   | 528    | 1309             |
| EPI_SPECIFIC CLUSTERS | 12912              | 919            | 707   | 600  | 342                  | 153    | 122    | 326              |
| ESC_SPECIFIC CLUSTERS | 46753              | 6564           | 4919  | 4193 | 2742                 | 1141   | 952    | 2326             |
| ES_EPI_SHARED         | 8508               | 2711           | 1910  | 1586 | 1216                 | 381    | 230    | 1088             |
| MEF_SPECIFIC CLUSTERS | 23864              | 149            | 124   | 142  | 65                   | 35     | 62     | 49               |
| NSC_SPECIFIC CLUSTERS | 53228              | 741            | 608   | 524  | 306                  | 184    | 183    | 199              |

## B. PERCENTAGE OF CLUSTERS IN EACH DATASET SHOWING OVERLAP WITH

|                       | total <sup>a</sup> | O <sup>b</sup> | S      | N      | O <sup>c</sup> _uniq | S_uniq | N_uniq | OSN <sup>d</sup> |
|-----------------------|--------------------|----------------|--------|--------|----------------------|--------|--------|------------------|
| ALL_EPI_CLUSTERS      | 100.00%            | 20.29%         | 13.34% | 9.41%  | 10.05%               | 3.17%  | 1.34%  | 6.02%            |
| ALL_ESC_CLUSTERS      | 100.00%            | 19.92%         | 14.01% | 10.87% | 9.65%                | 3.49%  | 2.17%  | 6.49%            |
| ALL_MEF_CLUSTERS      | 100.00%            | 6.42%          | 4.00%  | 2.20%  | 3.76%                | 1.44%  | 0.49%  | 1.10%            |
| ALL_NSC_CLUSTERS      | 100.00%            | 6.82%          | 4.76%  | 2.98%  | 3.65%                | 1.54%  | 0.65%  | 1.61%            |
| EPI_SPECIFIC CLUSTERS | 100.00%            | 7.12%          | 5.48%  | 4.65%  | 2.65%                | 1.18%  | 0.94%  | 2.52%            |
| ESC_SPECIFIC CLUSTERS | 100.00%            | 14.04%         | 10.52% | 8.97%  | 5.86%                | 2.44%  | 2.04%  | 4.98%            |
| ES_EPI_SHARED         | 100.00%            | 31.86%         | 22.45% | 18.64% | 14.29%               | 4.48%  | 2.70%  | 12.79%           |
| MEF_SPECIFIC CLUSTERS | 100.00%            | 0.62%          | 0.52%  | 0.60%  | 0.27%                | 0.15%  | 0.26%  | 0.21%            |
| NSC_SPECIFIC CLUSTERS | 100.00%            | 1.39%          | 1.14%  | 0.98%  | 0.57%                | 0.35%  | 0.34%  | 0.37%            |

**a** total number of clusters in each dataset

**b** total number (or percent, as indicated) of clusters that overlap a ChIP-seq peak for Oct4 (O), Sox2 (S), or Nanog (N)

**c** number (or percent) of clusters that overlap a ChIP-seq peak for Oct4 (O), Sox2 (S), or Nanog (N) in the absence of either other factor.

**d** number (or percent) of clusters that overlap ChIP-seq peaks for all three factors (i.e. predicted to co-bind Oct4 (O), Sox2 (S) and Nanog (N)).
